# Supplementary material for: Priority Setting with Multi-Stakeholder Engagement Improves Neurology Residency Didactic Curriculum
Source: Research Square preprint supplement (doi:10.21203/rs.3.rs-7256400/v1), 2025-09-23
Supplement: Supplementary file 1 [file 4c01946ec3ddf9dbe5fe8b34.docx]

**Supplementary Data 2: Post-intervention surveys**

**Current Residents**

**Demographics:**

1. Gender
   - Man
   - Woman
   - Non-binary
   - Transgender man
   - Transgender woman
   - Not listed: (write in)
   - Prefer not to say
2. Medical School Education
   - US MD
   - US DO
   - Caribbean MD
   - IMG
3. Which residency are you in?

- Adult neurology
- Pediatric neurology

1. Current PGY level
   - PGY1
   - PGY2
   - PGY3
   - PGY4
   - PGY5
2. What type of learner are you primarily? (select one)
   - Auditory
   - Kinesthetic (aka hands-on)
   - Reading/writing
   - Visual
   - Other (write in)
3. Have you decided if you will pursue a fellowship?

- Yes
- No
- Undecided

6a) If yes which fellowship will you pursue (select one)

- Autonomic disorders
- Cognitive neurology
- Clinical trials
- Clinical neurophysiology (EEG track)
- Clinical neurophysiology (EMG track)
- Epilepsy
- Headache
- Interventional neurology
- Mitochondrial disorders
- Movement disorders
- Neuro-infectious diseases
- Neuro-oncology
- Neuro-ophthalmology
- Neuro-otology
- Neurocritical care
- Neurogenetics
- Neurohospitalist
- Neuroimmunology/Multiple Sclerosis
- Neurometabolics
- Neuromuscular medicine
- Neuropsychiatry/Behavioral Neurology
- Pain medicine
- Pediatric Movement disorders
- Pediatric Epilepsy
- Pediatric Neuroimmunology
- Pediatric Neurooncology
- Pediatric Stroke
- Sleep medicine
- Vascular neurology
- Women’s neurology
- Other (write in)

**Didactic Curriculum:**

1. The overall amount of time dedicated to didactic seminars (eg., noon conference, grand rounds, CV case conference)?

- Too much
- Just enough
- Too little

1. How many hours a week on average do you attend didactic seminars (eg., noon conference, grand rounds, CV case conference, autoimmune neurology case conference, etc.)? Write in (# of hours)
2. The three strongest areas of our curriculum are (select up to three):
   - Autonomic disorders
   - Business of medicine
   - Cerebrovascular disorders
   - Child neurology
   - Clinical EEG
   - Clinical EMG
   - EBM strategies
   - Healthcare disparities
   - Medical education
   - Neuroanatomy
   - Neuroimaging
   - Neurologic exam skills
   - Neuromuscular disorders
   - Neuro-ophthalmology
   - Neuro-otology
   - Pre-clinical neurophysiology
   - Psychiatry
   - Quality and patient safety
   - Research
   - Wellness
   - Women’s health issues in neurology
   - Other
3. The three weakest areas of our curriculum are:
   - Autonomic disorders
   - Business of medicine
   - Cerebrovascular disorders
   - Child neurology
   - Clinical EEG
   - Clinical EMG
   - EBM strategies
   - Healthcare disparities
   - Medical education
   - Neuroanatomy
   - Neuroimaging
   - Neurologic exam skills
   - Neuromuscular disorders
   - Neuro-ophthalmology
   - Neuro-otology
   - Pre-clinical neurophysiology
   - Psychiatry
   - Quality and patient safety
   - Research
   - Wellness
   - Women’s health issues in neurology
   - Other
4. Top area where we spend too much time in our didactics (select 1):
   - Autonomic disorders
   - Business of medicine
   - Cerebrovascular disorders
   - Child neurology
   - Clinical EEG
   - Clinical EMG
   - EBM strategies
   - Healthcare disparities
   - Medical education
   - Neuroanatomy
   - Neuroimaging
   - Neurologic exam skills
   - Neuromuscular disorders
   - Neuro-ophthalmology
   - Neuro-otology
   - Pre-clinical neurophysiology
   - Psychiatry
   - Quality and patient safety
   - Research
   - Wellness
   - Women’s health issues in neurology
   - Other
5. Top area where we spend not enough time in our didactics (select 1):
   - Autonomic disorders
   - Business of medicine
   - Cerebrovascular disorders
   - Child neurology
   - Clinical EEG
   - Clinical EMG
   - EBM strategies
   - Healthcare disparities
   - Medical education
   - Neuroanatomy
   - Neuroimaging
   - Neurologic exam skills
   - Neuromuscular disorders
   - Neuro-ophthalmology
   - Neuro-otology
   - Pre-clinical neurophysiology
   - Psychiatry
   - Quality and patient safety
   - Research
   - Wellness
   - Women’s health issues in neurology
   - Other
6. How much time do you spend on average in week on self-study (i.e, reading about cases, doing questions, reviewing articles, etc.)? ___ hours (write in, whole numbers)
7. When you are doing self-study, which type of resources do you typically use? (select all that apply)
   - Educational websites
   - Interactive learning (eg., case stacks)
   - Journals (eg., Continuum, Practical Neurology)
   - Neurology textbooks
   - Primary research papers
   - Podcasts
   - Review papers
   - Question banks
   - Twitter (Meded posts)
   - Videos (eg., youtube)
   - Other (write in)
8. Of the following teaching strategies, which do you think most enhance your learning (select up to 3)
   - Case-based learning
   - Debates (ex. defend your approach to acute myasthenia crisis work-up and treatment)
   - Panel (audience asks “the experts” questions)
   - Peer instruction (aka flipped classroom)
   - Questions (jeopardy style or otherwise)
   - Simulation-based education
   - Teach/read and then apply/discuss (provide traditional lecture or reading material and then apply it to cases or have group discuss)
   - Traditional lecture
   - Other (write in)
9. Rate your agreement with this statement: As it currently stands I am satisfied with our didactic curriculum’s content
   - 1-strongly disagree
   - 2- disagree
   - 3- neutral
   - 4- agree
   - 5- strongly agree

16b) (If answered 1, 2 or 3) Please explain the reason for your rating (free text)

1. Rate your agreement with this statement: As it currently stands I am satisfied with the teaching strategies and delivery of didactic curriculum
   - 1-strongly disagree
   - 2- disagree
   - 3- neutral
   - 4- agree
   - 5- strongly agree

17b) (If answered 1, 2 or 3) Please explain the reason for your rating (free text)

1. Rate your agreement with this statement: As it currently stands our program’s didactic teaching sufficiently prepares me for RITE/Board exam
   - 1-strongly disagree
   - 2- disagree
   - 3- neutral
   - 4- agree
   - 5- strongly agree

18b) (If answered 1, 2 or 3) Please explain the reason for your rating (free text)

1. Name one from our monthly recurring conferences which you would improve:

- Program Leadership Townhall
- Wellness
- Quality
- Morren case conference
- Localization rounds
- EBM
- Outpatient clinical pearls
- None

19a) Describe the change you would like to see: (free text)

1. Name one from our monthly recurring conferences which you would remove:

- Program Leadership Townhall
- Wellness
- Quality
- Morren case conference
- Localization rounds
- EBM
- Outpatient clinical pearls
- None

1. Name one monthly recurring conferences which you would like to see added in our noon seminars, if any (write in):
2. Which format would you prefer for the didactic curriculum:
   - 2-week subspecialty blocks (eg., 2 weeks of CV in July, and the other 2 weeks of CV in January)
   - 4-week subspecialty blocks (eg., 4 weeks of CV, followed by 4 weeks of NM)
   - Chief complaint block (eg., vision loss block followed by foot drop block)
   - Continuous thread by subspecialty (eg., every other Mon is CV, Tues is NM)
   - Continuous thread by chief complaint (eg., every other Mon is vision issues, Tues is weakness)
   - Other idea (write in)

How would you like didactic material to be reviewed (select all that apply)

- - Ask all seminar leaders to review at the end of their seminar
  - Dedicated review seminars once per month
  - Dedicated review seminar once per quarter
  - Email/ electronic review sent once per month
  - Email/ electronic review sent once per quarter
  - I prefer to review on my own

1. I think the primary goal of our didactic curriculum should be:

- Review of foundational knowledge in clinical neurology
- Reinforcement of previously-learned material
- Application of concepts to clinical neurology
- Introduction of more advanced concepts
- Other (write in)

1. If I could change one thing about our didactic curriculum it would be: (free text)
2. How useful were the didactic and interactive seminars during the neuro-ophthalmology week in August 2023?
   1. 1-Not useful
   2. 2-Neutral
   3. 3- Useful
   4. 4- Very useful
   5. 5- Did not attend
3. Rate your agreement with this statement: There is a sufficient amount of neuroanatomy teaching in the didactic curriculum
   - 1-strongly disagree
   - 2- disagree
   - 3- neutral
   - 4- agree
   - 5- strongly agree
4. How useful is the new EMG curriculum (rotating in the EMG lab with hands-on experience) compared to the 2022-2023 academic year?
   - 1-Not useful
   - 2-Neutral
   - 3- Useful
   - 4- Very useful
   - 5- Did not attend/ cannot compare
5. How useful is the new quality curriculum (including new M&M sessions and decreased frequency of lectures) compared to the 2022-2023 academic year?
   - 1-Not useful
   - 2-Neutral
   - 3- Useful
   - 4- Very useful
   - 5- Did not attend/ cannot compare
6. Rate your agreement with this statement: I find the current structure of noon lectures with the lecture portion limited to 30 minutes more effective for my learning compared to the 2022-2023 academic year.
   - 1-Strongly disagree
   - 2- Disagree
   - 3- Neutral
   - 4- Agree
   - 5- Strongly agree
7. Rate your agreement with this statement: I find the lists of resources sent at the beginning of each subspecialty block helpful for self-study and review of materials.
   - 1-strongly disagree
   - 2- disagree
   - 3- neutral
   - 4- agree
   - 5- strongly agree
8. If I could add or change one thing about the review materials provided to residents, it would be: (free text)
9. If an introduction to neurology seminar series was added to the curriculum, what topics would you like to see covered? (free text)
10. Would you like to have a short block or recurring seminar series focused on internal medicine topics?
    - Strongly do not want
    - Do not want
    - Neutral
    - Want
    - Strongly want
11. If an internal medicine seminar series or block was added to the curriculum, what topics would you like to see covered? (free text)

**Teaching Staff**

**Demographics:**

1. Gender
   - Man
   - Woman
   - Non-binary
   - Transgender man
   - Transgender woman
   - Not listed: (write in)
   - Prefer not to say
2. Number of years in unsupervised practice?
   - 0-5
   - 6-10
   - 11-15
   - 16-20
   - 20+
3. Did you complete your residency at CCF Cleveland?
   - Yes
     1. Adult
     2. Child (including prior fellowship designation)
   - No
4. Did you complete a fellowship?
   - Yes
   - No

4a) If yes, in which subspecialty (list all as drop down)

- Autonomic disorders
- Cognitive neurology
- Clinical trials
- Clinical neurophysiology (EEG track)
- Clinical neurophysiology (EMG track)
- Epilepsy
- Headache
- Intervention neuroradiology
- Mitochondrial disorders
- Movement disorders
- Neuro-infectious diseases
- Neuro-oncology
- Neuro-ophthalmology
- Neuro-otology
- Neurocritical care
- Neurogenetics
- Neurohospitalist
- Neuroimmunology/Multiple Sclerosis
- Neurometabolics
- Neuromuscular medicine
- Neuropsychiatry/Behavioral Neurology
- Pain medicine
- Pediatric Movement disorders
- Pediatric Epilepsy
- Pediatric Neuroimmunology
- Pediatric Neurooncology
- Pediatric Stroke
- Sleep medicine
- Vascular neurology
- Women’s neurology
- Other (write in)

1. If you are on a formal career track, please select one:
   - Clinician scientist
   - Clinician educator
   - Master clinician
   - Clinician scholar
   - NA
2. What are your regular teaching commitments for the neurology residency program, select all that apply:
   - Outpatient clinic preceptor
   - Inpatient preceptor
   - Didactic instructor
   - Other: write-in
3. On average how many hours a month do you spend working with residents? (allow whole numbers only) (i.e., 40 hours per week x 6 weeks/year [240 hours] + 4 hours/week of clinic x 42 remaining weeks [168 hours] = 408 hours total/year / 12 months = 37 hours/month”)

**Didactic Curriculum:**

1. In working with the residents, I teach and/or evaluate resident knowledge/skills related to:
   - Autonomic disorders
   - Business of medicine
   - Cerebrovascular disorders
   - Child neurology
   - Clinical EEG
   - Clinical EMG
   - EBM strategies
   - Healthcare disparities
   - Medical education
   - Neuroanatomy
   - Neuroimaging
   - Neurologic exam skills
   - Neuromuscular disorders
   - Neuro-ophthalmology
   - Neuro-otology
   - Pre-clinical neurophysiology
   - Psychiatry
   - Quality and patient safety
   - Research
   - Wellness
   - Women’s health issues in neurology
   - Other
   - Insufficient info to rate
2. In working with the residents, I perceive their strongest knowledge/skills areas are (select up to three answers)
   - Autonomic disorders
   - Business of medicine
   - Cerebrovascular disorders
   - Child neurology
   - Clinical EEG
   - Clinical EMG
   - EBM strategies
   - Healthcare disparities
   - Medical education
   - Neuroanatomy
   - Neuroimaging
   - Neurologic exam skills
   - Neuromuscular disorders
   - Neuro-ophthalmology
   - Neuro-otology
   - Pre-clinical neurophysiology
   - Psychiatry
   - Quality and patient safety
   - Research
   - Wellness
   - Women’s health issues in neurology
   - Other
   - Insufficient info to rate
3. In working with the residents, I perceive their weakest knowledge/skills areas are (select up to three)
   - Autonomic disorders
   - Business of medicine
   - Cerebrovascular disorders
   - Child neurology
   - Clinical EEG
   - Clinical EMG
   - EBM strategies
   - Healthcare disparities
   - Medical education
   - Neuroanatomy
   - Neuroimaging
   - Neurologic exam skills
   - Neuromuscular disorders
   - Neuro-ophthalmology
   - Neuro-otology
   - Pre-clinical neurophysiology
   - Psychiatry
   - Quality and patient safety
   - Research
   - Wellness
   - Women’s health issues in neurology
   - Other
4. I use the following interactive strategies in my didactic teaching (select all that apply)
   - Brainstorming
   - Cases
   - Debates
   - Discussions
   - Fishbowl
   - Focused listing
   - Labs/problems
   - Peer instruction
   - Projects
   - Questioning
   - Think-pair-share
   - 2-minute paper
   - Other: write-in
   - None of the above
5. The number one resource I need to improve my didactic teaching is: (free text)
6. Rate your agreement with this statement: My didactic teaching is effective
   - 1-strongly disagree
   - 2- disagree
   - 3- neutral
   - 4- agree
   - 5- strongly agree
7. I feel the primary goal of the residency didactic curriculum should be:

- Review of foundational knowledge
- Reinforcement of previously-learned material
- Application of concepts to practice
- Introduction of more advanced concepts
- Other (write in)

1. If I could change one thing about the residency didactic curriculum it would be: (free text)
2. Rate your agreement with this statement: My didactic teaching is sufficiently interactive.
   1. 1-strongly disagree
   2. 2- disagree
   3. 3- neutral
   4. 4- agree
   5. 5- strongly agree
3. Rate your agreement with this statement: There are currently enough sources available to improve teaching skills.
   - 1-strongly disagree
   - 2- disagree
   - 3- neutral
   - 4- agree
   - 5- strongly agree
4. Rate your agreement with this statement: I receive sufficient and timely feedback from residents and medical students.
   - 1-strongly disagree
   - 2- disagree
   - 3- neutral
   - 4- agree
   - 5- strongly agree
5. Rate your agreement with this statement: I find the current structure of noon seminars with the lecture portion limited to 30 minutes more effective for my teaching compared to the 2022-2023 academic year.
   - 1-strongly disagree
   - 2- disagree
   - 3- neutral
   - 4- agree
   - 5- strongly agree
6. Which of the following has the biggest negative impact on your ability to provide a high-quality didactic lecture?
   - My ability to arrive on time from patient care requirements
   - Residents arriving too late to noon conference
   - Technology failure
   - Other (write in)
   - My didactic teaching is not negatively impacted by any factors
7. Would you like to see a dedicated introduction to neurology seminar series for PGY1s/early PGY2s?
   - Strongly do not want
   - Do not want
   - Neutral
   - Want
   - Strongly want
8. If an introduction to neurology seminar series was added to the curriculum, what topics would you like to see covered? (free text)
9. Would you like to have a short didactic block or recurring seminar series focused on internal medicine topics for the residents?
   - Strongly do not want
   - Do not want
   - Neutral
   - Want
   - Strongly want
10. If an internal medicine seminar series or block was added to the curriculum, what topics would you like to see covered? (free text)

**Alumni**

**Demographics:**

1. Gender
   - Man
   - Woman
   - Non-binary
   - Transgender man
   - Transgender woman
   - Not listed: (write in)
   - Prefer not to say
2. Medical School Education
   - US MD
   - US DO
   - Caribbean MD
   - IMG
3. Training completed
   - Adult neurology residency
   - Pediatric (including those previously designated as fellowship training)
4. Number of years since completion of *residency-* __ years (whole numbers)
5. Did you complete any fellowships?
   - Yes
     1. At CCF
     2. Outside of CCF (list institution – optional)
   - No
6. If yes which fellowships have you completed (select all that apply)

- Autonomic disorders
- Cognitive neurology
- Clinical trials
- Clinical neurophysiology (EEG track)
- Clinical neurophysiology (EMG track)
- Epilepsy
- Headache
- Intervention neuroradiology
- Mitochondrial disorders
- Movement disorders
- Neuro-infectious diseases
- Neuro-oncology
- Neuro-ophthalmology
- Neuro-otology
- Neurocritical care
- Neurogenetics
- Neurohospitalist
- Neuroimmunology/Multiple Sclerosis
- Neurometabolics
- Neuromuscular medicine
- Neuropsychiatry/Behavioral Neurology
- Pain medicine
- Pediatric Movement disorders
- Pediatric Epilepsy
- Pediatric Neuroimmunology
- Pediatric Neurooncology
- Pediatric Stroke
- Sleep medicine
- Vascular neurology
- Women’s neurology
- Other (write in)

1. Are you currently primarily employed in the healthcare field (including clinical, industry, regulatory, research positions, and other similar positions)?
   - Yes
   - No

6a) If no: Select reason for no longer being in the healthcare field

- Switched careers due to burnout
- Switched career for non-burnout reason
- Became primary homemaker
- Retired
- Disabled
- Unemployed
- Other
- Prefer not to say

1. Are you currently in clinical practice?
   - Yes
   - No

7a) If yes: What is your current primary practice setting?

- CCF
- Other academic center
- Community-based
- Private practice
- Federally qualified health center
- Other (write in)

7b) If yes: In which clinical settings do you see patients (select all that apply)

- Inpatient
- Outpatient
- Virtual
- Other

8) Is your primary employment in the healthcare field, but predominately non-clinical?

- - Yes
  - No

8a) If yes which of the following best describes your primary job responsibilities

- Researcher
- Medical science liaison
- Drug/product representative
- Other pharmaceutical company role
- Healthcare administration
- FDA reviewer
- Political advocacy
- Teaching/education
- Non-profit organization administration
- Other: write-in

1. Do you regularly participate in teaching medical students, residents, or fellows?
   1. Yes
   2. No
2. Do you currently hold an academic ranking?
   1. Yes
   2. No

9a) If yes: select your rank:

- Adjunct professor
- Instructor
- Assistant professor
- Associate professor
- Professor

1. Since you graduated from residency have you had any of following accomplishments (select all that apply)
   1. Large grant funding award (covered at least 50% of your salary)
   2. Any grant funding
   3. Peer reviewed publication
   4. Invited publication
   5. Abstract presentation at professional meeting
   6. Journal editorial board member
   7. Medical education leadership position
   8. Academic society leadership
   9. Engaged in political advocacy work
   10. Health care administration leadership
   11. Other (write in)

**Didactic Curriculum:**

1. Considering your career now what do you think are the three most important areas to cover in the residency didactic curriculum:
   - Autonomic disorders
   - Business of medicine
   - Cerebrovascular disorders
   - Child neurology
   - Clinical EEG
   - Clinical EMG
   - EBM strategies
   - Healthcare disparities
   - Medical education
   - Neuroanatomy
   - Neuroimaging
   - Neurologic exam skills
   - Neuromuscular disorders
   - Neuro-ophthalmology
   - Neuro-otology
   - Pre-clinical neurophysiology
   - Psychiatry
   - Quality and patient safety
   - Research
   - Wellness
   - Women’s health issues in neurology
   - Other
2. Considering your career now what do you think are the three least important areas to cover in the residency didactic curriculum:
   - Autonomic disorders
   - Business of medicine
   - Cerebrovascular disorders
   - Child neurology
   - Clinical EEG
   - Clinical EMG
   - EBM strategies
   - Healthcare disparities
   - Medical education
   - Neuroanatomy
   - Neuroimaging
   - Neurologic exam skills
   - Neuromuscular disorders
   - Neuro-ophthalmology
   - Neuro-otology
   - Pre-clinical neurophysiology
   - Psychiatry
   - Quality and patient safety
   - Research
   - Wellness
   - Women’s health issues in neurology
   - Other
3. Rate your agreement with the following statement: Cleveland Clinic neurology residency didactic curriculum sufficiently prepared me for my post-residency career

1-strongly disagree

2- disagree

3- neutral

4- agree

5- strongly agree

1. Rate your agreement with the following statement: Cleveland Clinic neurology residency didactic curriculum prepared me well for the neurology board examination

1-strongly disagree

2- disagree

3- neutral

4- agree

5- strongly agree

1. Based on your experiences at your past and current institutions, what is the most important thing you recommend to the neurology residency program leadership related to the content of the didactic curriculum? (free text)

New questions:

1. Based on your experiences at your past and current institutions, which of the following formats would you recommend for the residency didactic curriculum? (select one or more options)
   1. Daily noon lectures
   2. Morning reports
   3. 2-week subspecialty blocks
   4. 4-week subspecialty blocks
   5. Chief complaint block (eg., vision loss block followed by foot drop block)
   6. Continuous thread by subspecialty (eg., every other Mon is CV, Tues is NM)
   7. Continuous thread by chief complaint (eg., every other Mon is vision issues, Tues is weakness)
   8. Faculty led didactics
   9. Fellow led didactics
   10. Resident led didactics
   11. Weekly case conferences
   12. Other (write in)
