# Supplementary material for: Priority Setting with Multi-Stakeholder Engagement Improves Neurology Residency Didactic Curriculum
Source: Research Square preprint supplement (doi:10.21203/rs.3.rs-7256400/v1), 2025-09-23
Supplement: Supplementary file 3 [file b26064fb8938f0dac7070c0a.docx]

**Supplemental Table 1: Detailed Survey Response Results**

**Table 1a: Primary purpose of didactic curriculum according to the residents and faculty**

| **Group & Survey** | **Application of concepts to clinical neurology** | **Introduction of more advanced concepts** | **Reinforcement of previously-learned material** | **Review of foundational knowledge in clinical neurology** | **Multiple selections** |
| --- | --- | --- | --- | --- | --- |
| Residents Baseline, percentage (n) | 28.2% (11) | 2.6% (1) | 0.0% (0) | 61.5% (24) | 7.7% (3)* |
| Residents Follow up, percentage (n) | 45.2% (14) | 6.5% (2) | 3.2% (1) | 45.2% (14) | 0.0% (0) |
| Faculty Baseline, percentage (n) | 53.6% (15) | 7.1% (2) | 0.0% (0) | 39.3% (11) | 0.0% (0) |
| Faculty Follow up, percentage (n) | 63.4% (26) | 7.3% (3) | 4.9% (2) | 24.4% (10) | 0.0% (0) |

*1 participant responded “all”,1 participant responded “review of foundational knowledge and application of concepts”, 1 participant responded “review of foundational knowledge and introduction of more advanced concepts”.

**Table 1b: Teaching strategies that most enhanced learning according to the residents in the baseline and follow-up surveys**

| **Teaching strategy** | **Percentage (n) at baseline (total n = 114)** | **Percentage (n) at follow-up (total n = 80)** |
| --- | --- | --- |
| Case-based learning | 24.6% (28) | 28.7% (23) |
| Questions (e.g., Jeopardy-style or otherwise) | 17.5% (20) | 25.0% (20) |
| Teach/read then apply/discuss | 14.9% (17) | 15.0% (12) |
| Peer instruction or flipped classroom | 9.6% (11) | 6.2% (5) |
| Traditional lecture | 8.8% (10) | 7.5% (6) |
| Debates | 7.0% (8) | 2.5% (2) |
| Simulation-based education | 6.1% (7) | 8.8% (7) |
| Panel discussions | 3.5% (4) | 7.5% (6) |
| Other | 0.9% (1) | 0.0% (0) |

**Table 1c: Most used interactive teaching strategies according to the faculty in the baseline and follow-up surveys**

| **Teaching strategy** | **Percentage (n) at baseline (total n = 105)** | **Percentage (n) at follow-up (total n = 153)** |
| --- | --- | --- |
| Case-based teaching | 22.9% (24) | 18.0% (33) |
| Discussions | 21.9% (23) | 18.0% (33) |
| Questioning | 16.2% (17) | 15.3% (28) |
| Brainstorming | 10.5% (11) | 7.1% (13) |
| Two-minute paper | 5.7% (6) | 1.1% (2) |
| Peer instruction | 4.8% (5) | 7.1% (13) |
| Problem-solving | 4.8% (5) | 2.7% (5) |
| Focused listing | 3.8% (4) | 6.0% (11) |
| Fishbowl | 1.9% (2) | 0.5% (1) |
| Debates | 1.9% (2) | 1.6% (3) |
| Projects | 0% (0) | 2.2% (4) |
| Think-pair-share | 0% (0) | 2.2% (4) |
| Other | 2.9% (3) | 1.6% (3) |

**Table 1d: Effectiveness of the didactic teaching according to the faculty in the baseline and follow-up surveys**

| **Group & Survey** | **Strongly Agree** | **Agree** | **Neutral** | **Disagree** | **Strongly Disagree** |
| --- | --- | --- | --- | --- | --- |
| Residents (Baseline), percentage (n) | 5.1% (2) | 56.4% (22) | 30.8% (12) | 7.7% (3) | 0.0% (0) |
| Residents (Follow-up)  percentage (n) | 7.1% (2) | 67.9% (19) | 25.0% (7) | 0.0% (0) | 0.0% (0) |
| Faculty (Baseline)  percentage (n) | 16.1% (5) | 74.2% (23) | 6.5% (2) | 3.2% (1) | 0.0% (0) |
| Faculty (Follow-up)  percentage (n) | 7.3% (3) | 70.7% (29) | 19.5% (8) | 2.4% (1) | 0.0% (0) |

**Table 1e: Preparedness for RITE exam according to the residents in the baseline and follow-up surveys**

| **Survey** | **Strongly agree** | **Agree** | **Neutral** | **Disagree** | **Strongly disagree** |
| --- | --- | --- | --- | --- | --- |
| Baseline  percentage (n) | 12.8% (5) | 0.0% (0) | 25.6% (10) | 7.7% (3) | 2.6% (1) |
| Follow-up  percentage (n) | 6.5% (2) | 0.0% (0) | 12.9% (4) | 0.0% (0) | 0.0% (0) |

**Table 1f: Preparedness for the neurology board exams according to the alumni in the baseline and follow-up surveys**

|  | **Strongly agree** | **Agree** | **Neutral** | **Disagree** | **Strongly disagree** |
| --- | --- | --- | --- | --- | --- |
| Baseline  percentage (n) | 66.7% (18) | 22.2% (6) | 11.1% (3) | 0.0% (0) | 0.0% (0) |
| Follow-up  percentage (n) | 36.4% (12) | 48.5% (16) | 3.0% (1) | 6.1% (2) | 6.1% (2) |

**Table 1g: Preparedness for post-residency careers according to the alumni in the baseline and follow-up surveys**

|  | **Strongly agree** | **Agree** | **Neutral** | **Disagree** | **Strongly disagree** |
| --- | --- | --- | --- | --- | --- |
| Baseline  percentage (n) | 59.3% (16) | 25.9% (7) | 11.1% (3) | 3.7% (1) | 0.0% (0) |
| Follow-up  percentage (n) | 30.3% (10) | 51.5% (17) | 9.1% (3) | 3.0% (1) | 6.1% (2) |

**Table 1h: Limited didactic time (30 minutes or less) according to the residents and faculty in the follow-up surveys**

| **Response Category** | **Residents**  **(percentage, count)** | **Faculty**  **(percentage, count)** |
| --- | --- | --- |
| Strongly agree | 3.2% (1) | 4.9% (2) |
| Agree | 54.8% (17) | 24.4% (10) |
| Neutral | 32.3% (10) | 53.7% (22) |
| Disagree | 9.7% (3) | 17.1% (7) |
| Strongly disagree | 0% (0) | 0% (0) |

**Table 1i: Areas where too much time is spent according to the residents in the baseline and follow-up surveys**

| **Area of neurology** | **Baseline**  **(percentage, count)** | **Follow up**  **(percentage, count)** |
| --- | --- | --- |
| Business of medicine | 0.0% (0) | 3.2% (1) |
| Autonomic disorders | 2.6% (1) | 0.0% (0) |
| Cerebrovascular disorders | 17.9% (7) | 25.8% (8) |
| Clinical EEG | 0.0% (0) | 9.7% (3) |
| Clinical EMG | 0.0% (0) | 3.2% (1) |
| EBM strategies | 2.6% (1) | 0.0% (0) |
| Epilepsy | 2.6% (1) | 3.2% (1) |
| Headache | 0.0% (0) | 6.5% (2) |
| Insufficient info to rate | 25.6% (10) | 12.9% (4) |
| Miscellaneous | 2.6% (1) | 0.0% (0) |
| Neuro-immunology/Multiple Sclerosis | 5.1% (2) | 3.2% (1) |
| Neuro-infectious diseases | 0.0% (0) | 3.2% (1) |
| Neuro-otology | 2.6% (1) | 0.0% (0) |
| Neuroanatomy | 0.0% (0) | 3.2% (1) |
| Neurocritical care | 2.6% (1) | 0.0% (0) |
| Neuroimaging | 2.6% (1) | 0.0% (0) |
| Neuro pathology | 2.6% (1) | 0.0% (0) |
| Non-educational admin-related conferences | 2.6% (1) | 0.0% (0) |
| Psychiatry | 0.0% (0) | 9.7% (3) |
| Quality and patient safety | 23.1% (9) | 16.1% (5) |
| Quality/EBM/Localization | 2.6% (1) | 0.0% (0) |
| Wellness grant lectures | 2.6% (1) | 0.0% (0) |

Abbreviations: EEG = electroencephalography; EMG = electromyography; EBM = evidence-based medicine

**Table 1j: Areas where not enough time is spent according to the residents in the baseline and follow-up surveys**

| **Area of neurology** | **Baseline**  **(percentage, count)** | **Follow up**  **(percentage, count)** |
| --- | --- | --- |
| Business of medicine | 5.2% (2) | 5.2% (2) |
| Child neurology | 0.0% (0) | 5.1% (2) |
| Clinical EMG | 12.8% (5) | 2.6% (1) |
| Clinical trials | 2.6% (1) | 0.0% (0) |
| Cognitive neurology | 0.0% (0) | 2.6% (1) |
| EBM strategies | 2.6% (1) | 0.0% (0) |
| Epilepsy | 2.6% (1) | 0.0% (0) |
| Headache | 2.6% (1) | 0.0% (0) |
| Healthcare disparities | 2.6% (1) | 2.6% (1) |
| Insufficient info to rate | 17.9% (7) | 7.7% (3) |
| Medical education | 2.6% (1) | 0.0% (0) |
| Movement disorders | 2.6% (1) | 2.6% (1) |
| Neuro-infectious diseases | 2.6% (1) | 0.0% (0) |
| Neuro-ophthalmology | 5.1% (2) | 5.1% (2) |
| Neuro-otology | 0.0% (0) | 7.7% (3) |
| Neuroanatomy | 25.6% (10) | 10.3% (4) |
| Neurocritical care | 0.0% (0) | 2.6% (1) |
| Neurogenetics | 0.0% (0) | 2.6% (1) |
| Neuroimaging | 2.6% (1) | 5.1% (2) |
| Neurologic exam skills | 2.6% (1) | 7.7% (3) |
| Neuromuscular disorders | 0.0% (0) | 5.1% (2) |
| Pain medicine | 2.6% (1) | 0.0% (0) |
| Pre-clinical neurophysiology | 0.0% (0) | 2.6% (1) |
| Wellness | 2.6% (1) | 0.0% (0) |
| Women's health issues in neurology | 2.6% (1) | 2.6% (1) |

Abbreviations: EBM = evidence-based medicine

**Table 1k: Conferences needing improvement according to the residents in the baseline and follow-up surveys**

| **Conference** | **Baseline**  **(percentage, count)** | **Follow up**  **(percentage, count)** |
| --- | --- | --- |
| Evidence-based medicine | 5.1% (2) | 12.9% (4) |
| Localization rounds | 5.1% (2) | 0.0% (0) |
| Interesting case conference | 2.6% (1) | 6.5% (2) |
| Outpatient clinical pearls | 15.4% (6) | 35.5% (11) |
| Program leadership townhall | 0.0% (0) | 3.2% (1) |
| Quality and safety | 28.2% (11) | 16.1% (5) |
| Wellness | 2.6% (1) | 3.2% (1) |
| None | 41.0% (16) | 22.6% (7) |

**Table 1l: Usefulness of new neuro-ophthalmology and EMG teaching sessions according to the residents**

| **Category** | **Neuro-ophthalmology**  **(percentage, count)** | **EMG**  **(percentage, count)** |
| --- | --- | --- |
| Very useful | 41.9% (13) | 32.3% (10) |
| Useful | 12.9% (4) | 12.9% (4) |
| Neutral | 9.7% (3) | 3.2% (1) |
| Did not attend | 35.5% (11) | 51.6% (16) |

Abbreviations: EMG = electromyography
